# Supplementary material for: Workplace Antistigma Initiatives: A Scoping Study
Source: Atypon-hosted journal article supplement (doi:10.1176/appi.ps.201200409), 2013-04-01

**Appendix S1: Search Strategy****MEDLINE:**

The search strategy for OvidSP MEDLINE (2000 to July 27, 2011) retrieved 1489 references of which 1489 were unique and not duplicated in our other searches. I used a combination of MeSH and free text terms for:

| Set | History                                                                                                                                                                                                                                                                                                                                                                                                                                                                                                                                                                                                                                                                                                                                                    | Results | Comments                          |
|-----|------------------------------------------------------------------------------------------------------------------------------------------------------------------------------------------------------------------------------------------------------------------------------------------------------------------------------------------------------------------------------------------------------------------------------------------------------------------------------------------------------------------------------------------------------------------------------------------------------------------------------------------------------------------------------------------------------------------------------------------------------------|---------|-----------------------------------|
| 1   | stereotyping/ or social stigma/ or shame/ or prejudice/ or perception/ or "discrimination (psychology)"/ or social perception/ or judgment/ or (stigma or stigmas or stigmatiz* or stereotyp* or antistigma* or labeling or (social adj2 (accept* or approv*))).ti,ab.                                                                                                                                                                                                                                                                                                                                                                                                                                                                                     | 184700  | Stigma Terms                      |
| 2   | exp Mental Disorders/ or Mentally Ill Persons/                                                                                                                                                                                                                                                                                                                                                                                                                                                                                                                                                                                                                                                                                                             | 827522  | Mental Illness terms              |
| 3   | employment/ or employment, supported/ or personnel downsizing/ or unemployment/ or workplace/ or Occupations/ or exp "disciplines and occupations (non mesh)"/ or exp occupational groups/                                                                                                                                                                                                                                                                                                                                                                                                                                                                                                                                                                 | 2940536 | Employment/work terms             |
| 4   | exp Evaluation Studies as Topic/ or health education/ or patient education as topic/ or health promotion/ or healthy people programs/ or exp Teaching/ or Program Development/ or interviews as topic/ or focus groups/ or narration/ or questionnaires/ or self report/ or attitude/ or "attitude of health personnel"/ or attitude to health/ or health knowledge, attitudes, practice/ or Public opinion/ or inservice training/ or staff development/ or (campaign* or initiative* or aware* or program* or train* or interven* or workshop* or seminar* or curriculum* or (booster adj2 session*) or strateg* or implement* or course* or symposi* or coach* or mentor* or blitz* or policy or policies or guideline* or recommend* or standard*).mp. | 3721966 | Program evaluation/campaign terms |
| 5   | 1 and 2 and 3 and 4                                                                                                                                                                                                                                                                                                                                                                                                                                                                                                                                                                                                                                                                                                                                        | 2097    | Base clinical set                 |
| 6   | limit 5 to (yr="2000 -Current" and English language)                                                                                                                                                                                                                                                                                                                                                                                                                                                                                                                                                                                                                                                                                                       | 1489    | FINAL Results                     |

**EMBASE**

The search strategy for OvidSP EMBASE (2000 to Week 34) retrieved 1972 references of which 1821 were unique and not duplicated in our other searches. I used a combination of EMBASE and free text terms for

| Set | History                                 | Results | Comments     |
|-----|-----------------------------------------|---------|--------------|
| 1   | social psychology/ or stigma/ or social | 335756  | Stigma Terms |

|   |                                                                                                                                                                                                                                                                                                                                                                                                                                                                                                                                                                                                                                                                                                                                                                                                                                                                                                                                                                                                                                                                                                                                                                                                                                                                                                    |         |                                   |
|---|----------------------------------------------------------------------------------------------------------------------------------------------------------------------------------------------------------------------------------------------------------------------------------------------------------------------------------------------------------------------------------------------------------------------------------------------------------------------------------------------------------------------------------------------------------------------------------------------------------------------------------------------------------------------------------------------------------------------------------------------------------------------------------------------------------------------------------------------------------------------------------------------------------------------------------------------------------------------------------------------------------------------------------------------------------------------------------------------------------------------------------------------------------------------------------------------------------------------------------------------------------------------------------------------------|---------|-----------------------------------|
|   | discrimination/ or decision making/ or shame/ or perceptive discrimination/ or perception/ or (stereotyp* or prejudic* or stigma or stigmas or stigmatiz* or antistigma* or labeling or (social adj2 (accept* or approv*))).ti,ab.                                                                                                                                                                                                                                                                                                                                                                                                                                                                                                                                                                                                                                                                                                                                                                                                                                                                                                                                                                                                                                                                 |         |                                   |
| 2 | mental health/ or community mental health/ or psychological well being/ or exp mental disease/ or mental patient/                                                                                                                                                                                                                                                                                                                                                                                                                                                                                                                                                                                                                                                                                                                                                                                                                                                                                                                                                                                                                                                                                                                                                                                  | 1322963 | Mental Illness terms              |
| 3 | "occupation and occupation related phenomena"/ or exp occupation/ or exp occupational health/ or occupational science/ or exp work/ or unemployment/ or work/ or absenteeism/ or burnout/ or human factors research/ or job accommodation/ or job performance/ or exp personnel management/ or productivity/ or "quality of working life"/ or exp work environment/ or work experience/ or work schedule/ or working time/ or workplace/                                                                                                                                                                                                                                                                                                                                                                                                                                                                                                                                                                                                                                                                                                                                                                                                                                                           | 409655  | Employment/work terms             |
| 4 | employment discrimination/                                                                                                                                                                                                                                                                                                                                                                                                                                                                                                                                                                                                                                                                                                                                                                                                                                                                                                                                                                                                                                                                                                                                                                                                                                                                         | 230     | Employment discrimination term    |
| 5 | "evaluation and follow up"/ or evaluation/ or outcome assessment/ or health education/ or health promotion/ or patient education/ or psychoeducation/ or (healthy adj2 people adj2 program*).ti,ab. or education/ or education program/ or in service training/ or interdisciplinary education/ or "outcome of education"/ or teaching/ or program development/ or interview/ or semi structured interview/ or structured interview/ or unstructured interview/ or questionnaire/ or open ended questionnaire/ or structured questionnaire/ or (focus adj2 group*).ti,ab. or (narration* or narrative*).ti,ab. or interpersonal communication/ or self report/ or attitude/ or attitude to disability/ or attitude to health/ or attitude to mental illness/ or employee attitude/ or exp health personnel attitude/ or social worker attitude/ or attitude to health/ or social environment/ or organizational climate/ or psychosocial environment/ or public opinion/ or personnel management/ or (campaign* or initiative* or aware* or program* or train* or interven* or workshop* or seminar* or curriculum* or (booster adj2 session*) or strateg* or implement* or course* or symposi* or coach* or mentor* or blitz* or policy or policies or guideline* or recommend* or standard*).mp. | 4601104 | Program evaluation/campaign terms |
| 6 | ((1 and 2) or (2 and 4)) and 3 and 5                                                                                                                                                                                                                                                                                                                                                                                                                                                                                                                                                                                                                                                                                                                                                                                                                                                                                                                                                                                                                                                                                                                                                                                                                                                               | 2557    | Base clinical set                 |

|   |                                                        |      |               |
|---|--------------------------------------------------------|------|---------------|
| 7 | limit 25 to (english language and yr="2000 - Current") | 1972 | FINAL Results |
|---|--------------------------------------------------------|------|---------------|

## PsycINFO

The search strategy for OvidSP PsycINFO (2000 to August Week 5 2011) retrieved 515 references of which 358 were unique and not duplicated in our other searches. I used a combination of PSycINFO descriptor terms and free text terms for:

| Set | History                                                                                                                                                                                                                                                                                                                                                                                                                                                                                                                                                                                                                                                                                                                                                                         | Results     | Comments                          |
|-----|---------------------------------------------------------------------------------------------------------------------------------------------------------------------------------------------------------------------------------------------------------------------------------------------------------------------------------------------------------------------------------------------------------------------------------------------------------------------------------------------------------------------------------------------------------------------------------------------------------------------------------------------------------------------------------------------------------------------------------------------------------------------------------|-------------|-----------------------------------|
| 1   | stigma/ or labeling/ or exp prejudice/ or social acceptance/ or social approval/ or exp social discrimination/ or exp social perception/ or stereotyped attitudes/ or shame/ or discrimination/ or judgment/ or fairness/ or (stigma or stigmas or stigmatiz* or stereotyp* or antistigma* or labeling or (social adj2 (accept* or approv*))).mp. or disability discrimination/                                                                                                                                                                                                                                                                                                                                                                                                 | 112590      | Stigma Terms                      |
| 2   | exp mental disorders/ or psychiatric patients/ or psychiatric symptoms/ or "recovery (disorders)"/ or "relapse (disorders)"/ or work related illnesses/ or mental health/ or well being/                                                                                                                                                                                                                                                                                                                                                                                                                                                                                                                                                                                        | 425684      | Mental Illness terms              |
| 3   | exp occupations/ or employment history/ or occupational adjustment/ or exp occupational tenure/ or exp personnel/ or exp professional personnel/ or working women/ or exp employment status/ or employability/ or reemployment/ or supported employment/ or occupational health/ or "industrial and organizational psychology"/ or work related illnesses/ or exp working conditions/ or unemployment/ or personnel termination/ or downsizing/ or workplace*.mp. or "quality of work life"/ or occupational stress/ or organizational climate/ or exp working conditions/                                                                                                                                                                                                      | 296342      | Employment/work terms             |
| 4   | 1 and 2 and 3                                                                                                                                                                                                                                                                                                                                                                                                                                                                                                                                                                                                                                                                                                                                                                   | 1024        | Base Clinical Set                 |
| 5   | "mental illness (attitudes toward)"/ or structured clinical interview/ or mental health program evaluation/ or mental health programs/ or exp community mental health training/ or mental health inservice training/ or exp program development/ or exp program evaluation/ or health promotion/ or health attitudes/ or exp health education/ or health knowledge/ or health literacy/ or social marketing/ or client education/ or (health adj2 people adj2 program*).mp. or interviews/ or exp psychodiagnostic interview/ or interviewers/ or interviewing/ or qualitative research/ or questioning/ or narratives/ or "life review"/ or narrative therapy/ or storytelling/ or (focus adj2 group*).mp. or attitudes/ or exp "disabled (attitudes toward)"/ or exp employee | 115341<br>6 | Program evaluation/campaign terms |

|   |                                                                                                                                                                                                                                                                                                                                                                                                                                                                                                                                                                                                                                                                                                                    |     |                           |
|---|--------------------------------------------------------------------------------------------------------------------------------------------------------------------------------------------------------------------------------------------------------------------------------------------------------------------------------------------------------------------------------------------------------------------------------------------------------------------------------------------------------------------------------------------------------------------------------------------------------------------------------------------------------------------------------------------------------------------|-----|---------------------------|
|   | attitudes/ or employer attitudes/ or health attitudes/ or exp health personnel attitudes/ or occupational attitudes/ or public opinion/ or "work (attitudes toward)"/ or attitude measurement/ or exp attitude measures/ or questionnaires/ or mail surveys/ or exp surveys/ or telephone surveys/ or questionnaire*.mp. or inservice training/ or mental health inservice training/ or professional development/ or (campaign* or initiative* or aware* or program* or train* or interven* or workshop* or seminar* or curriculum* or (booster adj2 session*) or strateg* or implement* or course* or symposi* or coach* or mentor* or blitz* or policy or policies or guideline* or recommend* or standard*).mp. |     |                           |
| 6 | 4 and 5                                                                                                                                                                                                                                                                                                                                                                                                                                                                                                                                                                                                                                                                                                            | 692 | Research designs base set |
| 7 | limit 4 to 2260 research methods & experimental design                                                                                                                                                                                                                                                                                                                                                                                                                                                                                                                                                                                                                                                             | 2   | Research designs limit    |
| 8 | 6 or 7                                                                                                                                                                                                                                                                                                                                                                                                                                                                                                                                                                                                                                                                                                             | 694 | Base Clinical Set         |
| 9 | limit 8 to yr="2000 -Current"                                                                                                                                                                                                                                                                                                                                                                                                                                                                                                                                                                                                                                                                                      | 515 | Final Set                 |

### EBM Reviews - Cochrane Central Register of Controlled Trials

The search strategy for OvidSP EBM Reviews - CCTR (3<sup>rd</sup> Quarter 2011) retrieved 39 references of which 10 were unique and not duplicated in our other searches. This database consists exclusively of RCTs, no study design terms were used. I used a combination of primarily MeSH and free text terms for:

| Set | History                                                                                                                                                                                                                                                                                                                                                                                                                                                                                                                                              | Results | Comments              |
|-----|------------------------------------------------------------------------------------------------------------------------------------------------------------------------------------------------------------------------------------------------------------------------------------------------------------------------------------------------------------------------------------------------------------------------------------------------------------------------------------------------------------------------------------------------------|---------|-----------------------|
| 1   | stereotyping/ or social stigma/ or shame/ or prejudice/ or perception/ or "discrimination (psychology)"/ or social perception/ or judgment/ or (stigma or stigmas or stigmatiz* or stereotyp* or antistigma* or labeling or (social adj2 (accept* or approv*))).ti,ab. or social psychology/ or stigma/ or social discrimination/ or decision making/ or shame/ or perceptive discrimination/ or perception/ or (stereotyp* or prejudic* or stigma or stigmas or stigmatiz* or antistigma* or labeling or (social adj2 (accept* or approv*))).ti,ab. | 4033    | Stigma Terms          |
| 2   | exp Mental Disorders/ or Mentally Ill Persons/ or mental health/ or community mental health/ or psychological well being/ or exp mental disease/ or mental patient/                                                                                                                                                                                                                                                                                                                                                                                  | 32576   | Mental Illness terms  |
| 3   | employment/ or employment, supported/ or personnel downsizing/ or unemployment/ or                                                                                                                                                                                                                                                                                                                                                                                                                                                                   | 6178    | Employment/work terms |

|   |                                                                                                                                                                                                                                                                                                                                                                                                                                                                                                                                                     |    |           |
|---|-----------------------------------------------------------------------------------------------------------------------------------------------------------------------------------------------------------------------------------------------------------------------------------------------------------------------------------------------------------------------------------------------------------------------------------------------------------------------------------------------------------------------------------------------------|----|-----------|
|   | workplace/ or Occupations/ or exp "disciplines and occupations (non mesh)"/ or exp occupational groups/ or "occupation and occupation related phenomena"/ or exp occupation/ or exp occupational health/ or occupational science/ or exp work/ or unemployment/ or work/ or absenteeism/ or burnout/ or human factors research/ or job accommodation/ or job performance/ or exp personnel management/ or productivity/ or "quality of working life"/ or exp work environment/ or work experience/ or work schedule/ or working time/ or workplace/ |    |           |
| 4 | 1 and 2 and 3                                                                                                                                                                                                                                                                                                                                                                                                                                                                                                                                       | 39 | Final Set |

## ERIC

The search strategy for OvidSP ERIC (2000 to September 6, 2011) retrieved 10 references of which 8 were unique and not duplicated in our other searches. This database consists exclusively of RCTs, no study design terms were used. I used a combination of primarily ERIC and free text terms for:

| Set | History                                                                                                                                                                                                                                                                                                                                                                                                                                                                                                                                                                                                 | Results | Comments              |
|-----|---------------------------------------------------------------------------------------------------------------------------------------------------------------------------------------------------------------------------------------------------------------------------------------------------------------------------------------------------------------------------------------------------------------------------------------------------------------------------------------------------------------------------------------------------------------------------------------------------------|---------|-----------------------|
| 1   | stereotypes/ or "labeling (of persons)"/ or social bias/ or bias/ or peer acceptance/ or social attitudes/ or public opinion/ or social discrimination/ or (prejudic* or shame or fairness or judgement*).mp. or (stigma or stigmas or stigmatiz* or stereotyp* or antistigma* or labeling or (social adj2 (accept* or approv*))).mp.                                                                                                                                                                                                                                                                   | 46208   | Stigma Terms          |
| 2   | exp mental disorders/ or mental health/ or mental health programs/                                                                                                                                                                                                                                                                                                                                                                                                                                                                                                                                      | 28057   | Mental Illness terms  |
| 3   | exp occupations/ or employment/ or "occupational safety and health"/ or "quality of working life"/ or work environment/ or work life expectancy/ or exp employment/ or careers/ or employer employee relationship/ or employment opportunities/ or employment patterns/ or employment potential/ or employment practices/ or employment problems/ or employment programs/ or job development/ or job layoff/ or job placement/ or job security/ or reentry workers/ or work attitudes/ or work environment/ or working hours/ or exp unemployment/ or dislocated workers/ or job layoff/ or labor force | 72719   | Employment/work terms |

|   |                                                       |    |                   |
|---|-------------------------------------------------------|----|-------------------|
|   | nonparticipants/ or labor market/ or underemployment/ |    |                   |
| 4 | 1 and 2 and 3                                         | 29 | Base Clinical Set |
| 5 | limit 4 to yr="2000 -Current"                         | 10 | Final Set         |

### Social Work Abstracts

The search strategy for OvidSP Social Work Abstracts (2000 to September 6, 2011) retrieved 68 references of which 62 were unique and not duplicated in our other searches. This database does not have a controlled vocabulary/subject headings. I used a combination of free text terms for:

| Set | History                                                                                                                                                                                    | Results | Comments              |
|-----|--------------------------------------------------------------------------------------------------------------------------------------------------------------------------------------------|---------|-----------------------|
| 1   | prejudic* or shame or fairness or judgement* or (stigma or stigmas or stigmatiz* or stereotyp* or antistigma* or labeling or (social adj2 (accept* or approv*))).mp.                       | 1644    | Stigma Terms          |
| 2   | (((mental or psychiatric) adj2 (health or disorder* or disease* or syndrome* or illness*)) or (nervous adj2 breakdown*) or (schizophreni* or (obsessive adj2 compulsive) or depress*)).mp. | 8312    | Mental Illness terms  |
| 3   | (occupation* or work* or employment* or unemploy* or employed or employee* or job or jobs or worker* or staff or personnel).mp.                                                            | 27816   | Employment/work terms |
| 4   | 1 and 2 and 3                                                                                                                                                                              | 129     | Base Clinical Set     |
| 5   | limit 4 to yr="2000 -Current"                                                                                                                                                              | 68      | Final Set             |

### CINAHL

The search strategy for EBSCOHost CINAHL (2000 to September 1, 2011) retrieved 154 references of which 111 were unique and not duplicated in our other searches. This database does not contain animal studies and was not limited to humans. I used a combination of CINAHL and free text terms for:

| Set | History                                                                                                                                                                                                                                                       | Results | Comments             |
|-----|---------------------------------------------------------------------------------------------------------------------------------------------------------------------------------------------------------------------------------------------------------------|---------|----------------------|
| 1   | (MH "Stereotyping") OR (MH "Prejudice") OR (MH "Shame") OR (MH "Judgment") OR (MH "Public Opinion") OR (MH "Discrimination, Employment") OR (MH "Discrimination") OR (TX stigma*) OR (TX stigmatiz*) OR (TX stereotyp*) OR (TX antistigma*) OR (TX labeling ) | 29730   | Stigma Terms         |
| 2   | (MH "Mental Health") OR (MH "Mental Disorders+") OR (MH "Psychiatric Patients")                                                                                                                                                                               | 2033689 | Mental Illness terms |
| 3   | (MH "Occupations and Professions+") OR                                                                                                                                                                                                                        | 60625   | Employment/work      |

|   |                                                                                                                                                                                                                                                                                                                                                                                                                                                                                                                                                                 |        |                                   |
|---|-----------------------------------------------------------------------------------------------------------------------------------------------------------------------------------------------------------------------------------------------------------------------------------------------------------------------------------------------------------------------------------------------------------------------------------------------------------------------------------------------------------------------------------------------------------------|--------|-----------------------------------|
|   | (MH "Employment") OR (MH "Employment of Disabled+") OR (MH "Employment Status") OR (MH "Employment Termination") OR (MH "Job Change") OR (MH "Part Time Employment") OR (MH "Self Employment") OR (MH "Temporary Employment") OR (MH "Unemployment")                                                                                                                                                                                                                                                                                                            |        | terms                             |
| 4 | (MH "Attitude of Health Personnel+") OR (MH "Attitude to Health") OR (MH "Health Beliefs") OR (MH "Attitude to Mental Illness") OR (MH "Attitude to Illness") OR (TX campaign*) OR (TX initiative*) OR (TX aware*) OR (TX program*) OR (TX train*) OR (TX interven*) OR (TX workshop*) OR (TX seminar*) OR (TX curriculum*) OR (TX "booster session") OR (TX strateg*) OR (TX implement*) OR (TX course*) OR (TX symposi*) OR (TX coach*) OR (TX mentor*) OR (TX blitz*) OR (TX policy)OR (TX policies) OR (TX guideline*) OR (TX recommend*) OR (TX standard*) | 804835 | Program evaluation/campaign terms |
| 5 | 1 and 2 and 3 and 4                                                                                                                                                                                                                                                                                                                                                                                                                                                                                                                                             | 176    | Base clinical set                 |
| 6 | Limit 6 to 2000 to current                                                                                                                                                                                                                                                                                                                                                                                                                                                                                                                                      | 154    | Final Set                         |

### ABI/INFORM Global

The search strategy for ProQuest ABI/INFORM Global to September 2, 2011 retrieved 248 references of which 163 were unique and not duplicated in our other searches. This search interface does not post separate results for each topic, therefore the results column is blank except for the final results. I used a combination of ABI/INFORM subject and free-text terms for:

| Set | History                                                                                                                                                                                                                                                     | Results | Comments             |
|-----|-------------------------------------------------------------------------------------------------------------------------------------------------------------------------------------------------------------------------------------------------------------|---------|----------------------|
| 1   | (EXACT("Stereotypes" or "Social psychology" or "Discrimination" or "Prejudice" or stigma* or stigmatiz* or stereotyp* or antistigma* or labeling) or TI,AB(social near/2 accept*) or TI,AB(social near/2 approv*))                                          |         | Stigma Terms         |
| 2   | su.EXACT("Mental depression" or "Manic depression" or "Mental disorders" or "Bipolar disorder" or "Behavior disorders" or "Bipolar disorder" or "Emotional disorders" or "Mental depression" or "Neuroses" or "Personality disorders" or "Schizophrenia" or |         | Mental Illness terms |

|   |                                                                                 |     |           |
|---|---------------------------------------------------------------------------------|-----|-----------|
|   | "Mental health care" or "Mental health" or "Burnout" or "Anxieties" or "Worry") |     |           |
| 3 | 1 and 2                                                                         | 248 | Final Set |

### CBCA

The search strategy for ProQuest CBCA (Canadian Business and Current Affairs) to October 20, 2011 retrieved 21 references of which 20 were unique and not duplicated in our other searches. This search interface does not post separate results for each topic, therefore the results column is blank except for the final results. I used a combination of CBCA subject and free-text terms for:

| Set | History                                                                                                                                                                                                                                                                                                                     | Results | Comments             |
|-----|-----------------------------------------------------------------------------------------------------------------------------------------------------------------------------------------------------------------------------------------------------------------------------------------------------------------------------|---------|----------------------|
| 1   | (SU (Prejudice OR Stereotypes) OR (stigma* OR antistigma*))                                                                                                                                                                                                                                                                 |         | Stigma Terms         |
| 2   | SU(Mental illness OR Mental illness, Research OR Mentally ill OR DEPRESSION MENTAL OR depression treatment OR Schizophrenia OR schizophrenia treatment OR Anxiety disorders OR Post traumatic stress disorder OR Bipolar disorder OR bipolar I disorder OR psychiatric disorders OR Psychiatric Symptoms)                   |         | Mental Illness terms |
| 3   | (SU(Work OR Work environment OR Work at home OR Work ethic OR Work experience OR Workaholics OR Workers OR Workforce OR Working OR Workloads OR Workplace diversity OR Workplace education programs OR Workplaces OR Employment OR Employment discrimination OR Employment policies OR Employment practices OR Employment)) |         | Final Set            |
| 4   | 1 and 2 and 3                                                                                                                                                                                                                                                                                                               | 21      | Final Set            |

### Dissertation Abstracts

The search strategy for ProQuest Dissertation Abstracts (2000 to October 20 2011) retrieved 30 references of which 22 were unique and not duplicated in our other searches. This database indexes PhD dissertations and for this reason I excluded the study design methodologies as they are not available as subject terms. This search interface does not post separate results for each topic, therefore the results column is blank except for the final results. I used a combination of subject and free text terms for:

| Set | History                                                                                                                     | Results | Comments     |
|-----|-----------------------------------------------------------------------------------------------------------------------------|---------|--------------|
| 1   | (su.Exact("employment discrimination" or "stereotypees" or "discrimination" or "perceptions" or "prejudice") or cabs(CABS)) |         | Stigma Terms |



|   |                                                                                                                                                                                                                                                                                                                                                                                                                                                                                                                                                                           |    |                       |
|---|---------------------------------------------------------------------------------------------------------------------------------------------------------------------------------------------------------------------------------------------------------------------------------------------------------------------------------------------------------------------------------------------------------------------------------------------------------------------------------------------------------------------------------------------------------------------------|----|-----------------------|
|   | (cabs(stigma*) or cabs(stereotype*) or cabs(labelling) or cabs(antistigma*))                                                                                                                                                                                                                                                                                                                                                                                                                                                                                              |    |                       |
| 2 | su.Exact("mental depression" or "schizophrenia" or "psychiatry") or CABS (mental or mentally or anxiety or psychiatric or PTSD or posttraumatic or schizophrenia* or bipolar or personality)                                                                                                                                                                                                                                                                                                                                                                              |    | Mental Illness terms  |
| 3 | su.Exact("underemployment" or "employment" or "occupational training" or "workforce" or "workers" or "preemployment screening" or "working conditions" or "work life programs" or "work ethic" or "workplace violence" or "seasonal employment" or "work at home" or "workloads" or "workplace diversity" or "occupational choice" or "occupations" or "disabled workers" or "self employment" or "military occupations" or "full employment" or "temporary employment" or "work environment" or "work life balance" or "part time employment" or "workers compensation") |    | Employment/work terms |
| 4 | (1 and 2) or (2 and 3)                                                                                                                                                                                                                                                                                                                                                                                                                                                                                                                                                    | 30 | Final Set             |

### Sociological Abstracts

The search strategy for ProQuest Sociological Abstracts (2000 to October 7, 2011) retrieved 122 references of which 70 were unique and not duplicated in our other searches. This search interface does not post separate results for each topic, therefore the results column is blank except for the final results. This database publishes predominantly qualitative research which is why I excluded the quantitative methodology terms and searched specifically for stigma. I used a combination of textword terms to search for:

| Set | History                                                                                                                                          | Results | Comments                          |
|-----|--------------------------------------------------------------------------------------------------------------------------------------------------|---------|-----------------------------------|
| 1   | cabs(stigma*)                                                                                                                                    |         | Stigma terms                      |
| 2   | cabs(mental) or cabs(mentally) or cabs(psychiatric) or cabs(depress*) or cabs(schizophrenia*)                                                    |         | Mental Illness terms              |
| 3   | cabs(employ*) or cabs(work*) or cabs(Occupat*) or cabs(job) or cabs(jobs) or cabs(work) or cabs(workplace*) or cabs(personnel*)                  |         | Employment/work terms             |
| 4   | cabs(campaign*) or cabs(intiative*) or cabs(aware*) or cabs(program*) or cabs(train*) or cabs(interven*) or cabs(workshop*) or cabs(seminar*) or |         | Program evaluation/campaign terms |

|   |                                                                                                                                                                                                                                                                             |     |           |
|---|-----------------------------------------------------------------------------------------------------------------------------------------------------------------------------------------------------------------------------------------------------------------------------|-----|-----------|
|   | cabs(curriculum*) or cabs(booster) or cabs(session*) or cabs(strateg*) or cabs(implement*) or cabs(course*) or cabs(symposi*) or cabs(coach*) or cabs(mentor*) or cabs(blitz*) or cabs(policy) or cabs(policies) or cabs(guideline*) or cabs(recommend*) or cabs(standard*) |     |           |
| 5 | 1 and 2 and 3 and 4                                                                                                                                                                                                                                                         | 122 | Final Set |

### Appendix S2: Literature Search and Study Selection

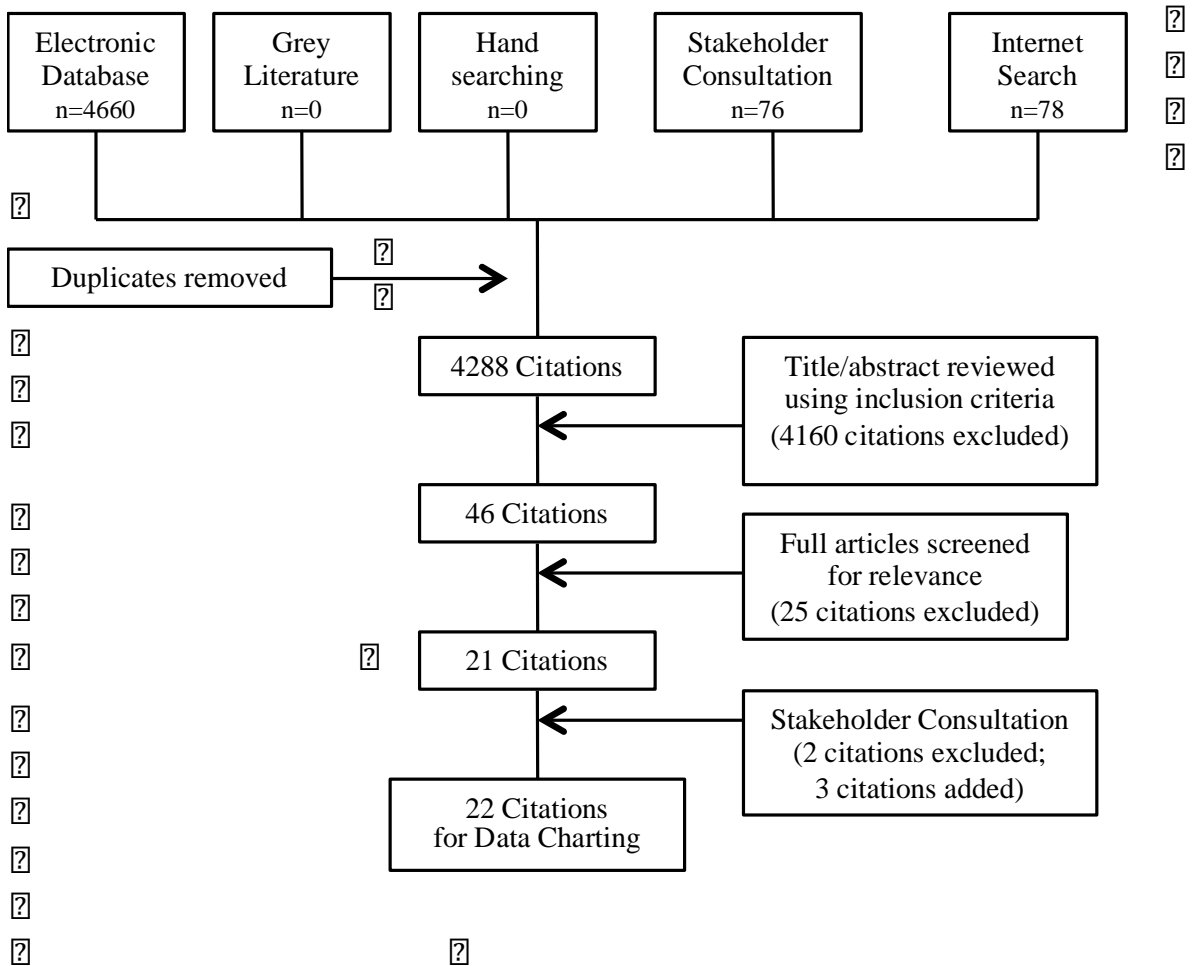

Supplement: 694_ds001.pdf [file 694_ds001.pdf]
